# Supplementary material for: Differential longitudinal establishment of human fecal bacterial communities in germ-free porcine and murine models
Source: PubMed Central journal article supplement (PMC7733510; doi:10.1038/s42003-020-01477-0), 2020-12-11
Supplement: 42003_2020_1477_MOESM1_ESM.pdf [file 42003_2020_1477_MOESM1_ESM.pdf]

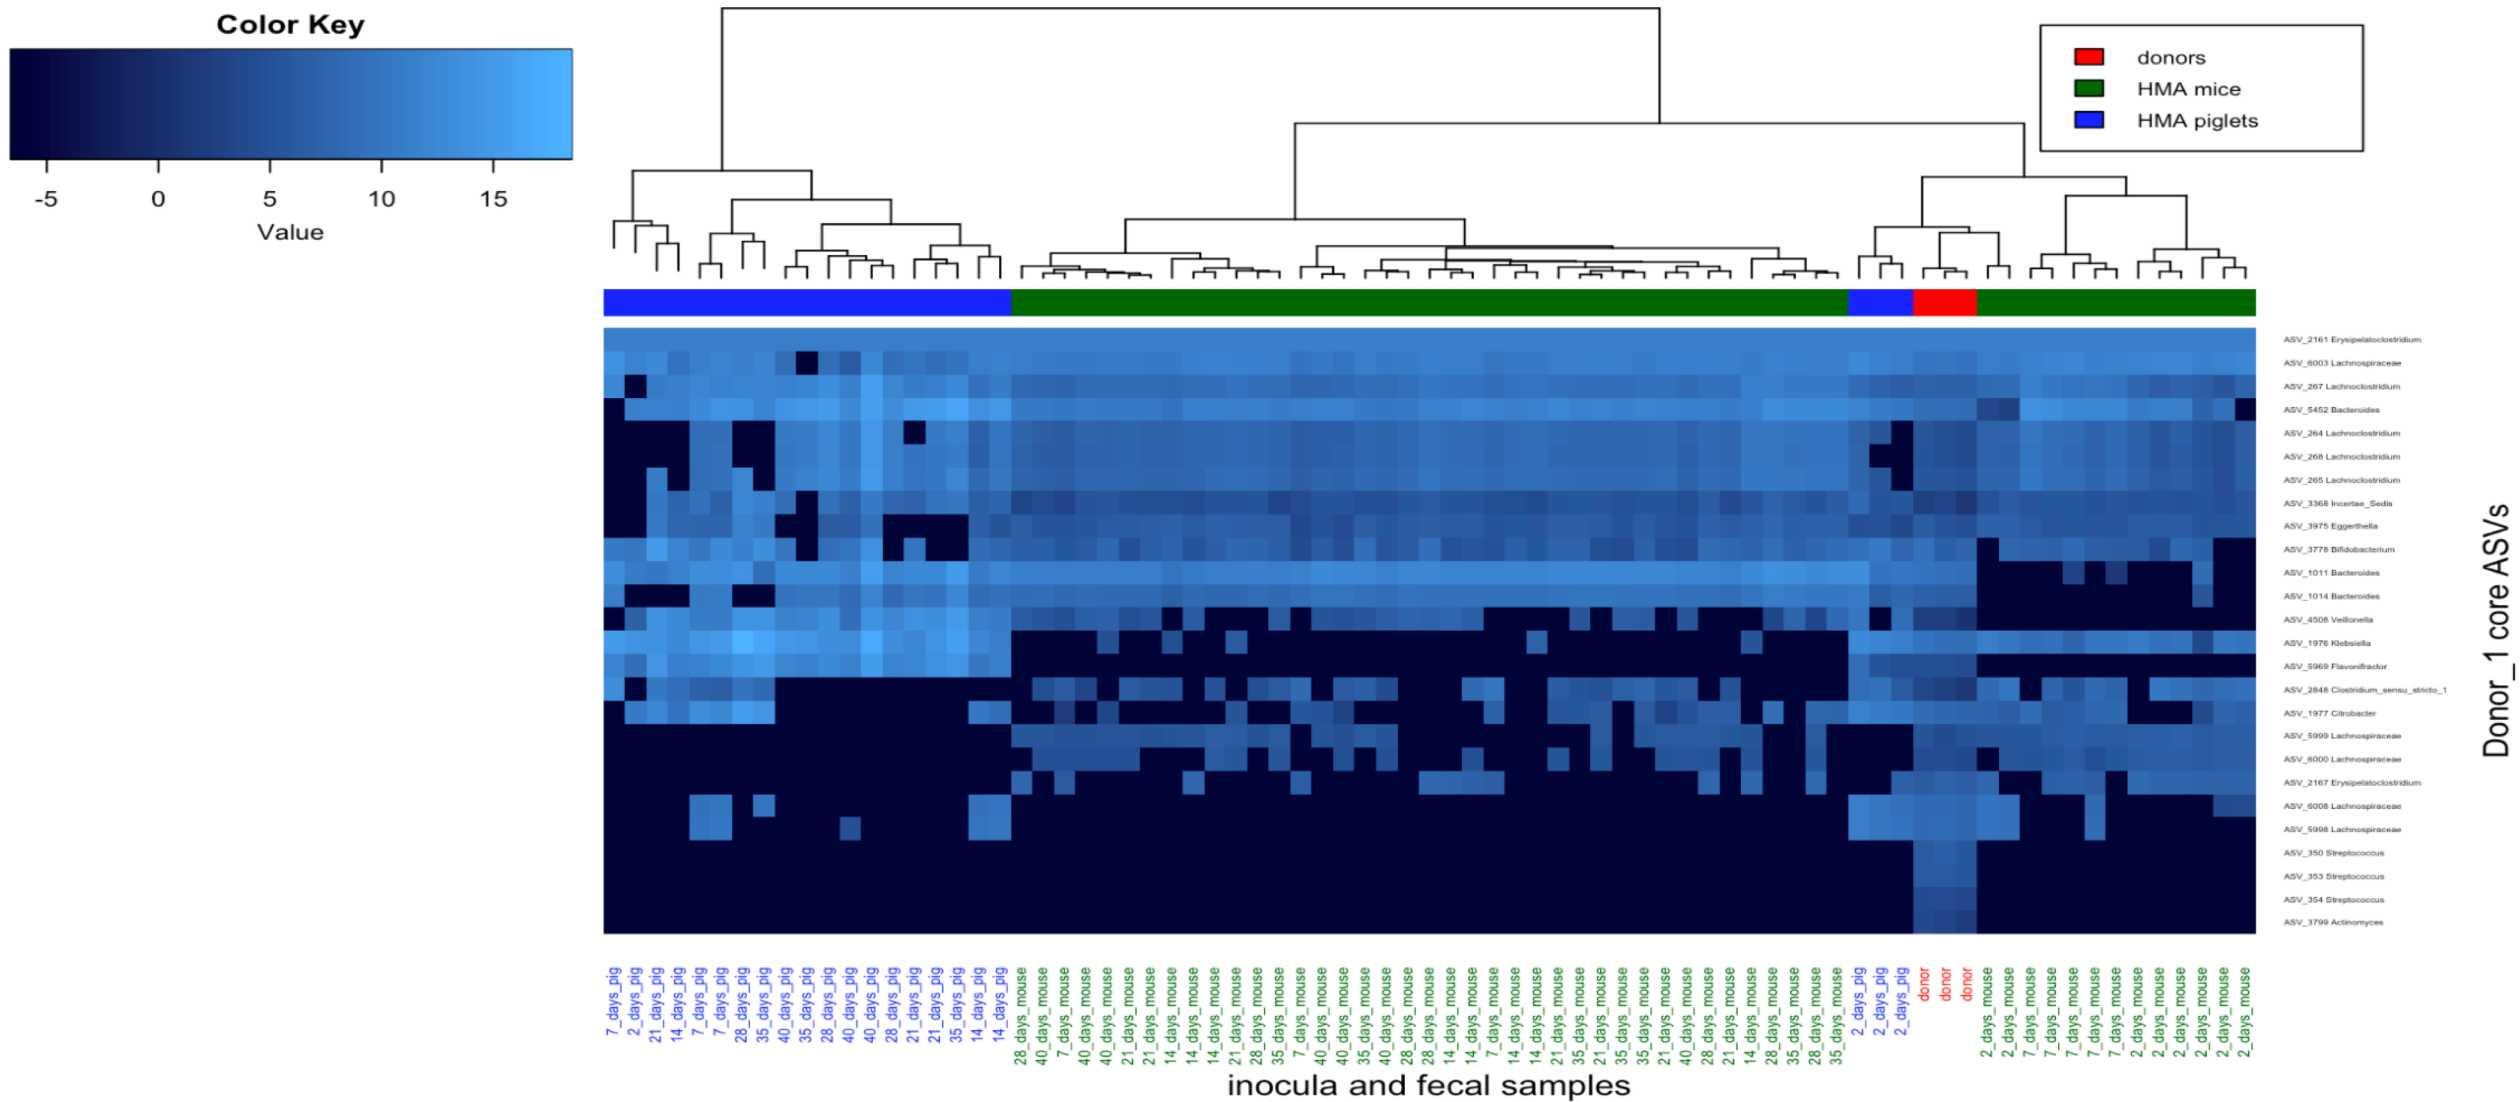

**Supplementary Figure 1:** Heatmap showing the distribution of core donor ASVs from Donor\_1 across the corresponding HMA mouse and piglet fecal samples at different time points. The abundances have been normalized using variance-stabilizing transformation. The dendrogram depicts sample clustering based on Bray-Curtis distances.





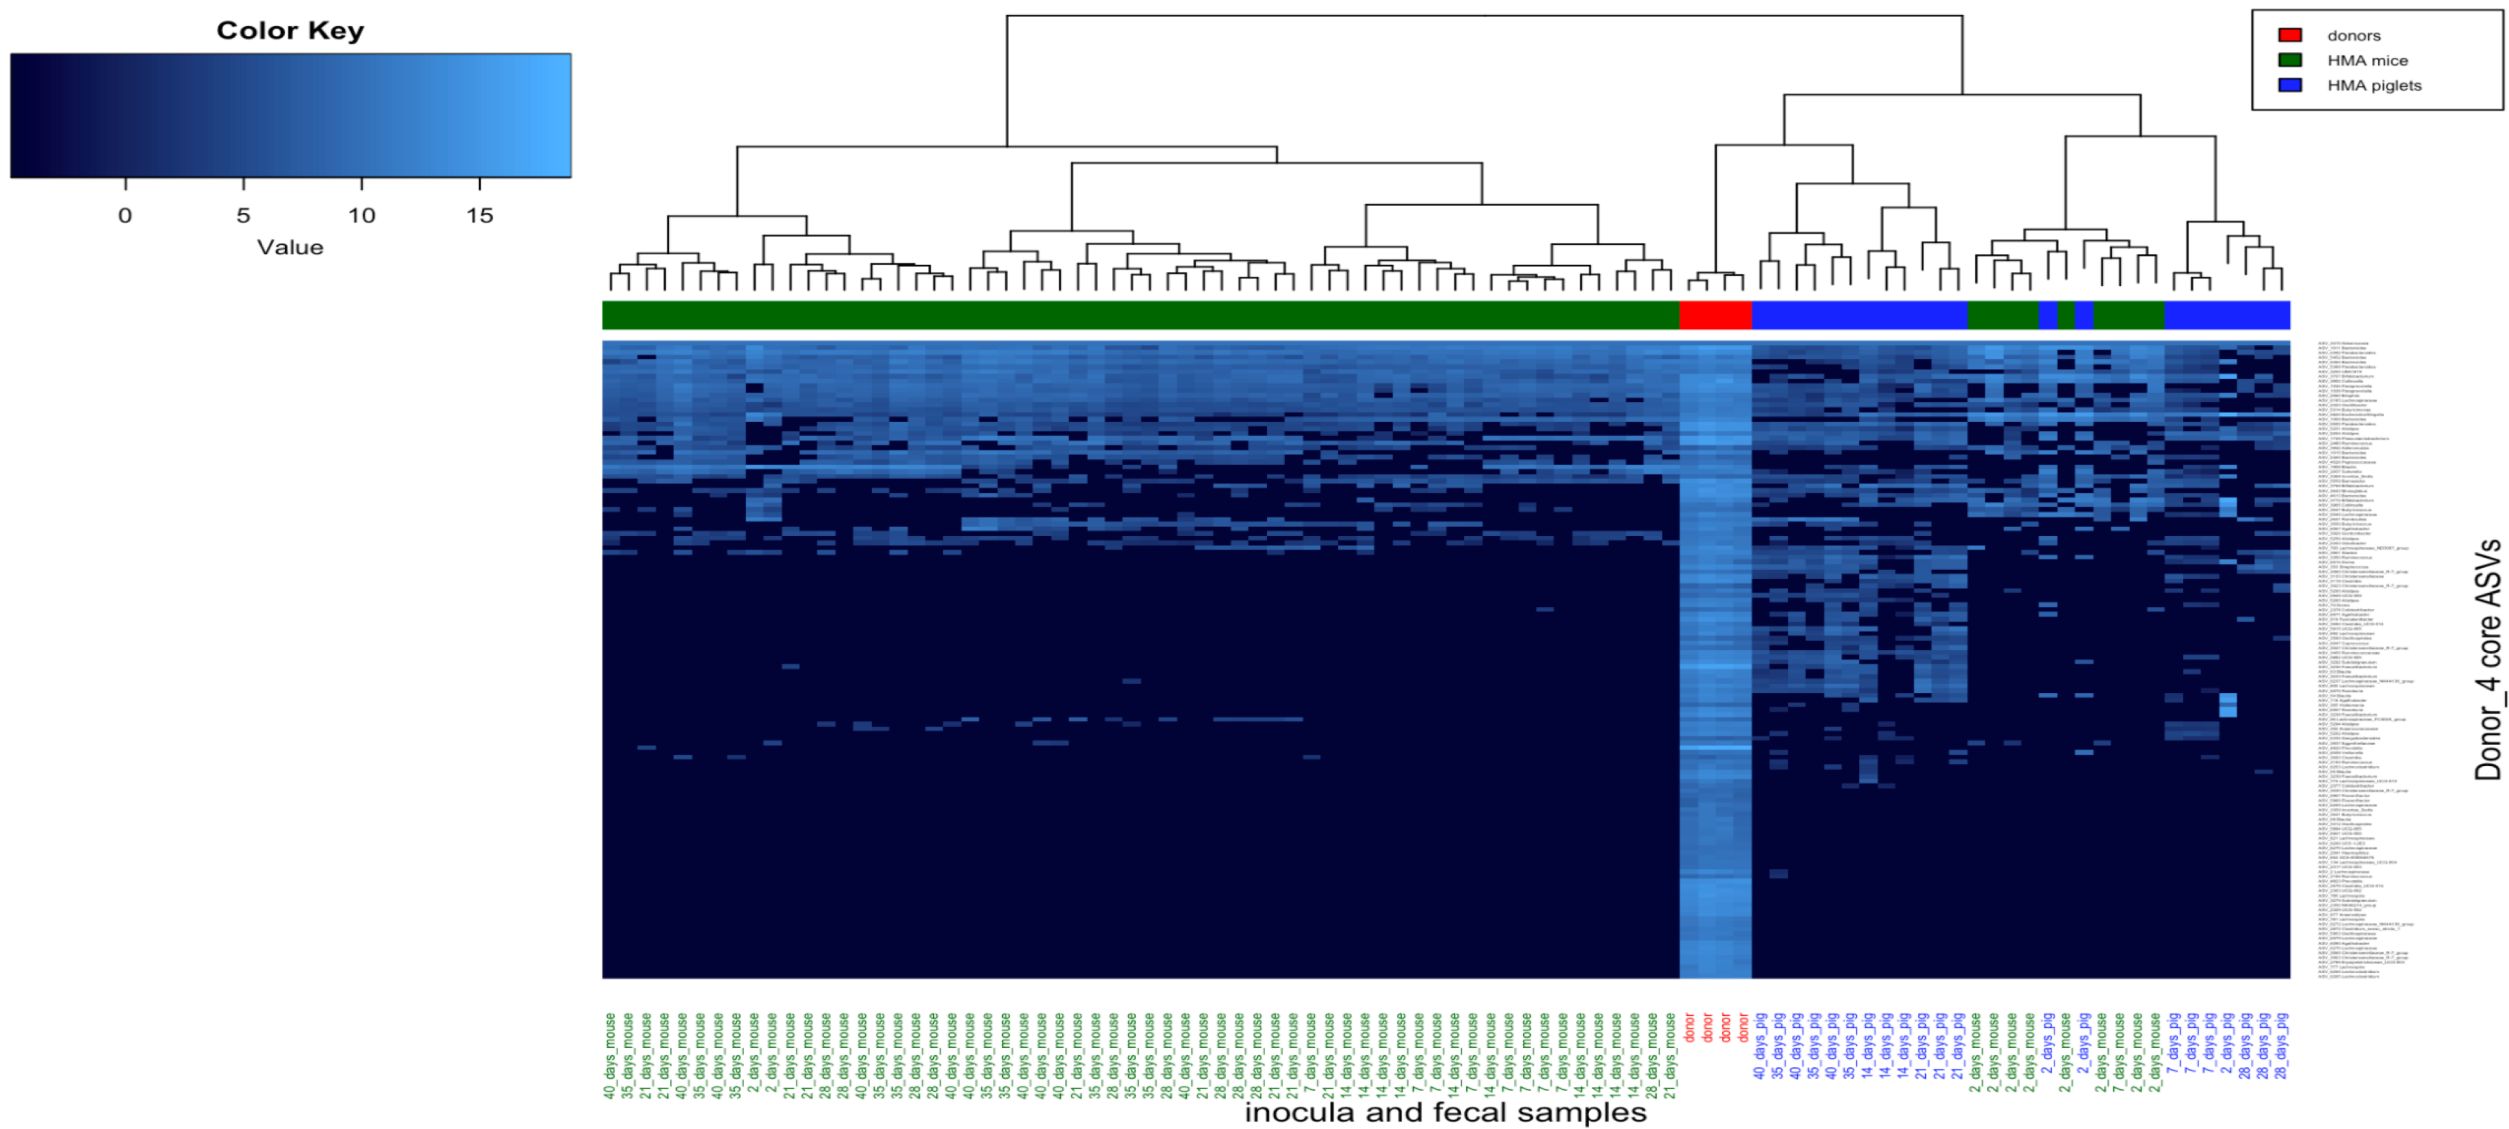

**Supplementary Figure 4:** Heatmap showing the distribution of core donor ASVs from Donor\_4 across the corresponding HMA mouse and piglet fecal samples at different time points. The abundances have been normalized using variance-stabilizing transformation. The dendrogram depicts sample clustering based on Bray-Curtis distances.

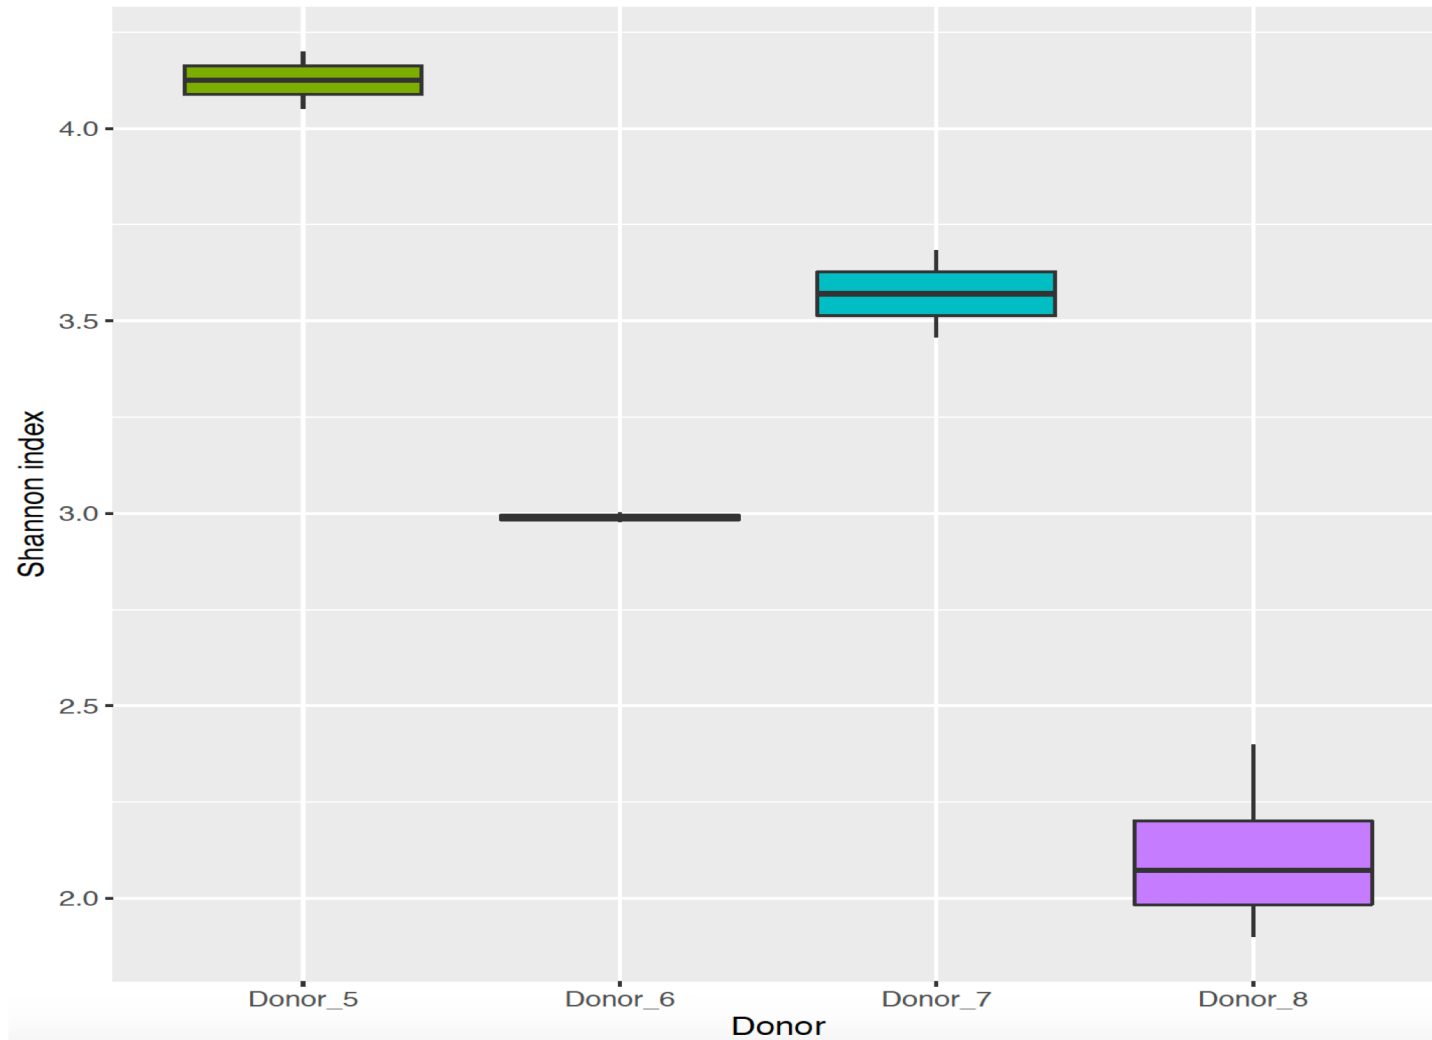

**Supplementary Figure 5:** Box-whisker plot comparing the alpha diversity of the inocula among the different donors of the second study using the Shannon index. Statistical comparisons were performed using the Wilcoxon rank-sum test. None of the donor diversities were statistically significantly different from each other. The box represents the 25<sup>th</sup> and 75<sup>th</sup> percentiles as the interquartile range (IQR) and the short black line represents the median. The whiskers represent the minimum and maximum values. Outliers are shown as black dots.  $n = 2$  inoculum aliquots for Donor\_5, Donor\_6, and Donor\_7;  $n = 4$  inoculum aliquots for Donor\_8.

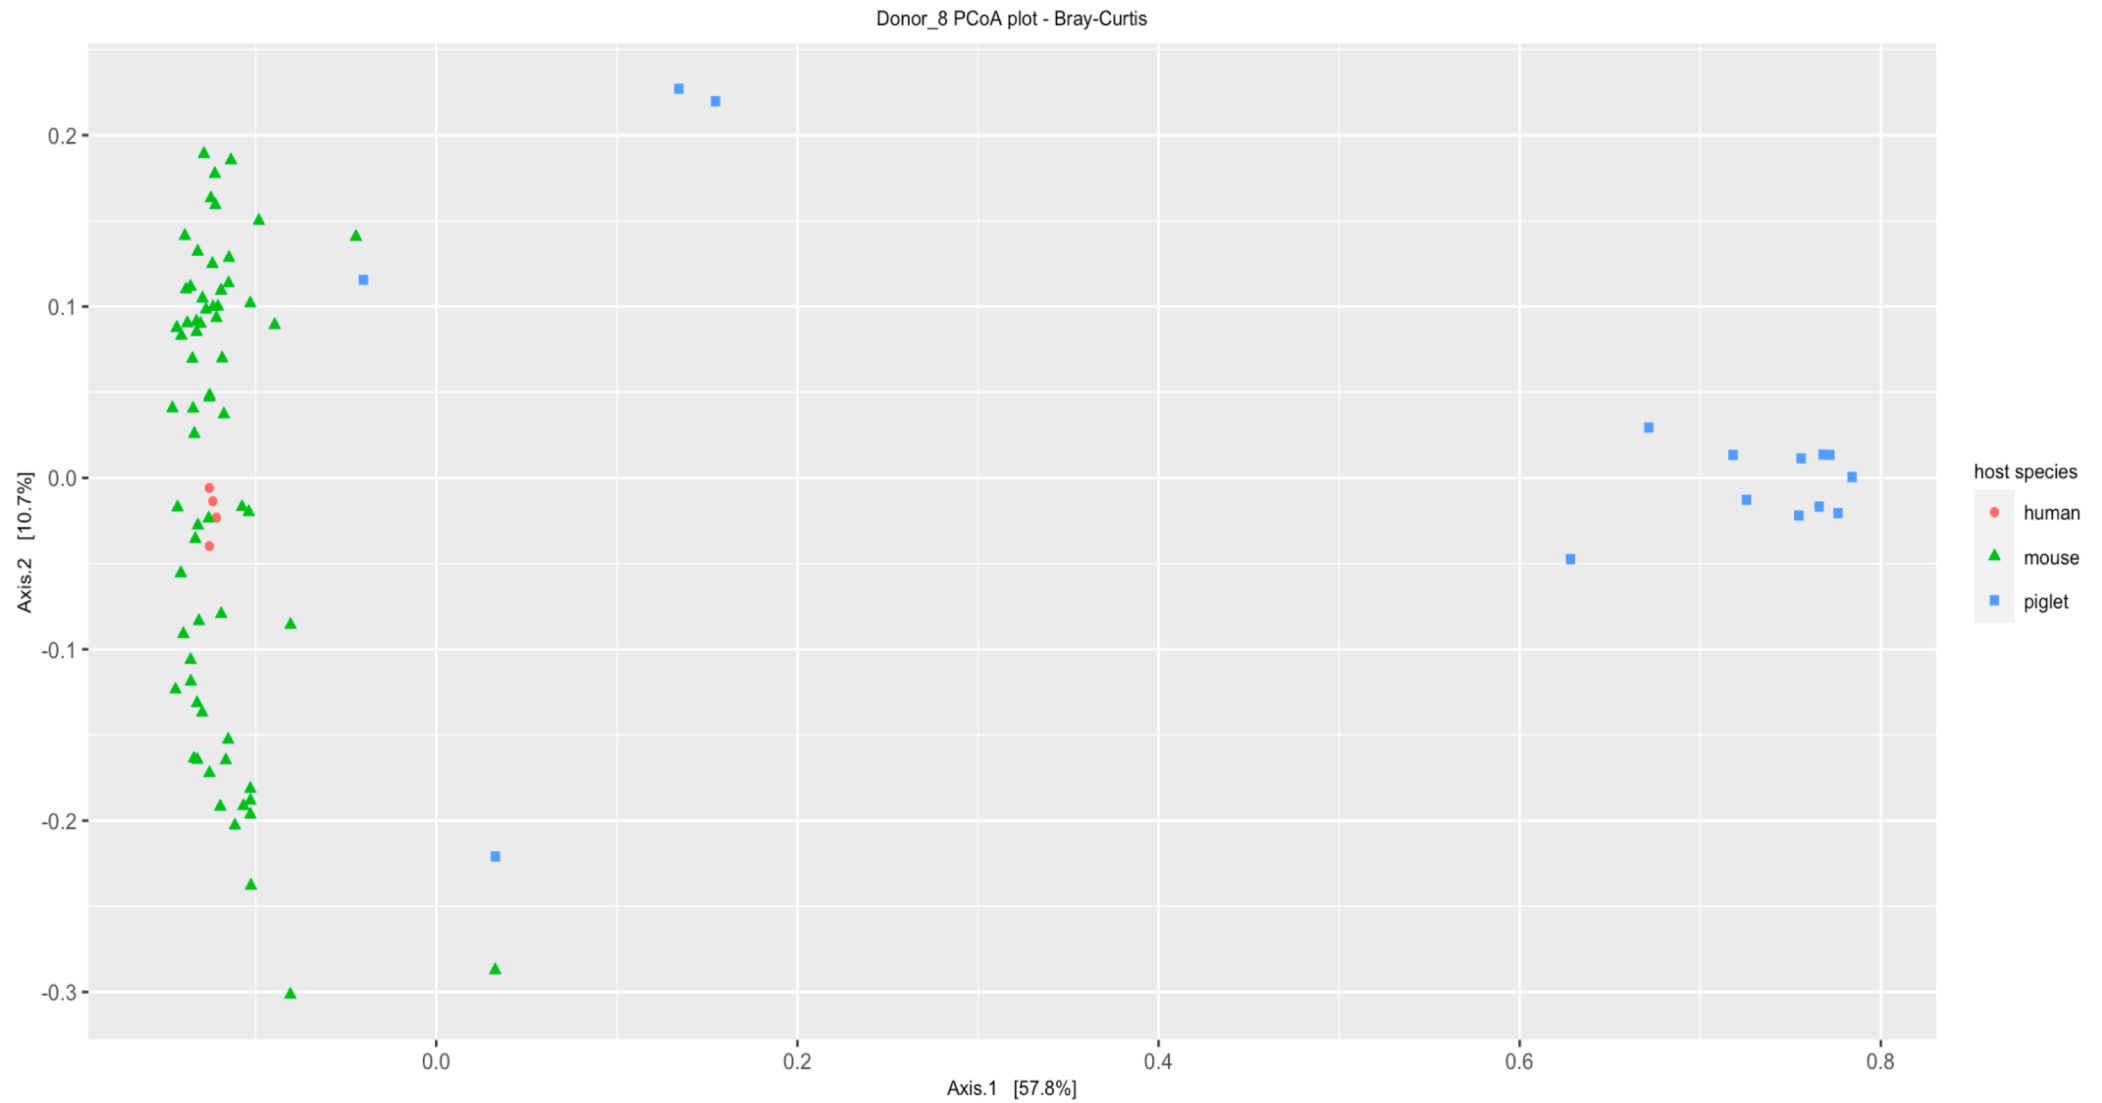

**Supplementary Figure 6:** Principal coordinate analysis plot based on Bray-Curtis distances comparing beta diversity of Donor\_8 (infant) inocula with HMA mouse and HMA piglet fecal samples.  $n = 4$  piglets and  $n = 10$  mice. Red circles, human donor inocula; green triangles, HMA mouse fecal samples; blue squares, HMA piglet fecal samples.

PICRUST Donor\_1 PCoA plot

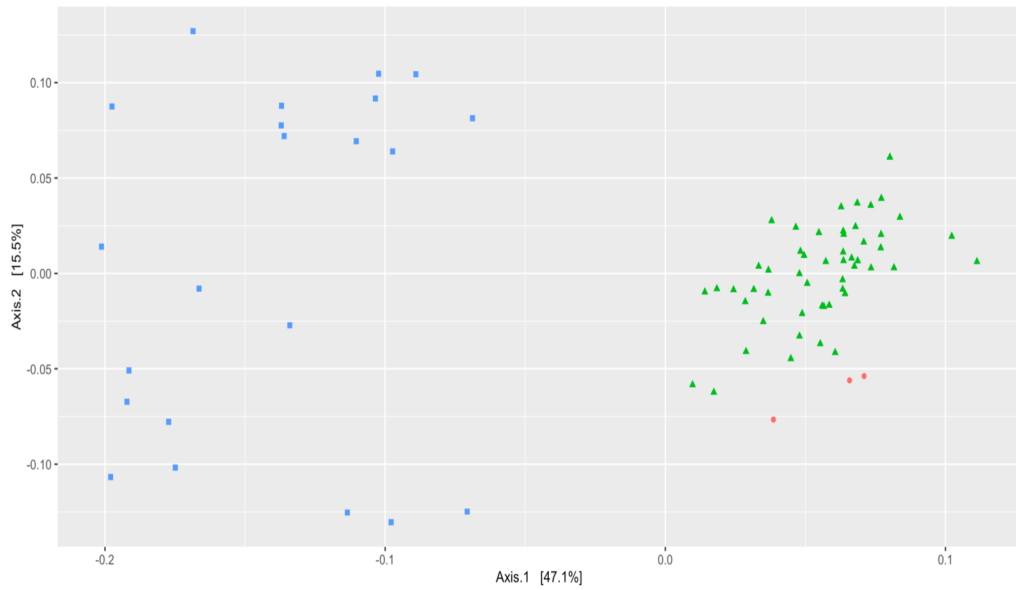

(a)

PICRUST Donor\_2 PCoA plot

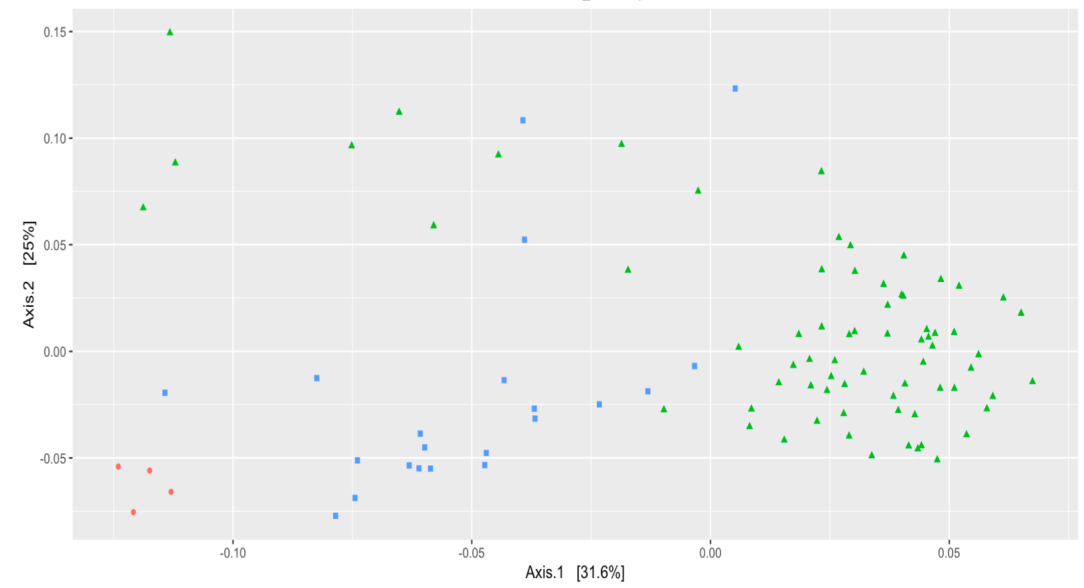

(b)

PICRUST Donor\_3 PCoA plot

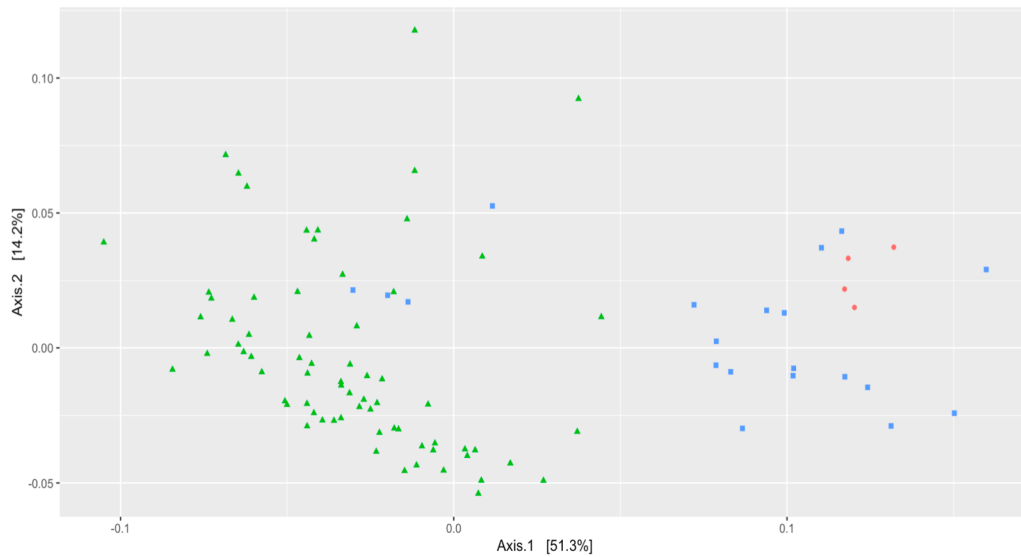

(c)

PICRUST Donor\_4 PCoA plot

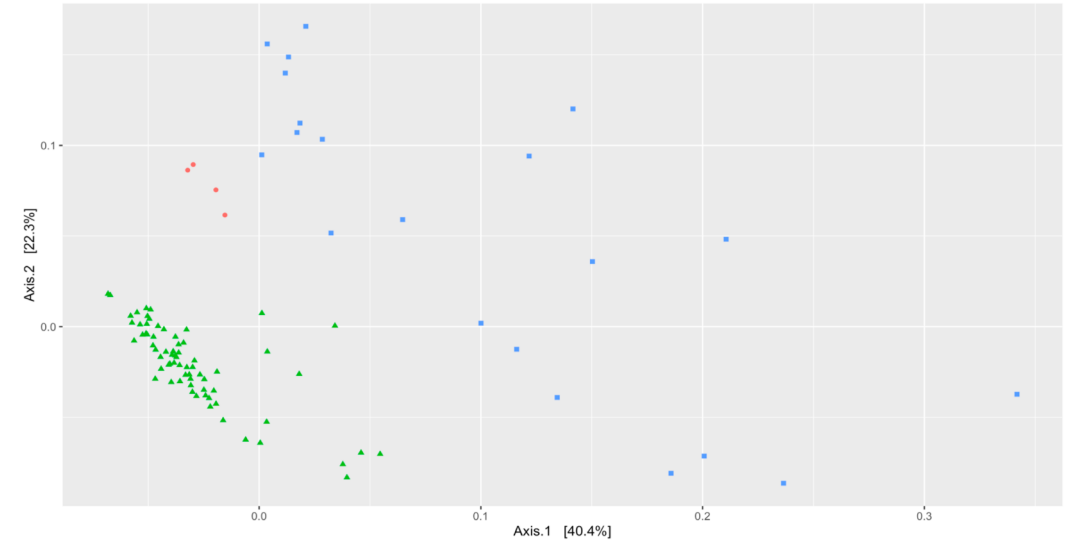

(d)

host species

- human
- ▲ mouse
- piglet

**Supplementary Figure 7:** Principal coordinate analysis (PCoA) plots based on Bray-Curtis distances comparing core PICRUST-predicted KEGG orthology (KO) functions between the human donors and the HMA animal models. (a) Donor\_1 (b) Donor\_2 (c) Donor\_3 and (d) Donor\_4.  $n = 13$  (3 piglets/donor, with the exception  $n=4$  for Donor\_1, 2 days post inoculation) and  $n = 37$  mice (Donor\_1=7, Donor\_2 = 10, Donor\_3 = 10, Donor\_4 = 10). Red circles, human donor inocula; green triangles, HMA mouse fecal samples; blue squares, HMA piglet fecal samples.
